# Supplementary material
Source: PubMed Central journal article supplement (PMC1606511)

Fold Index

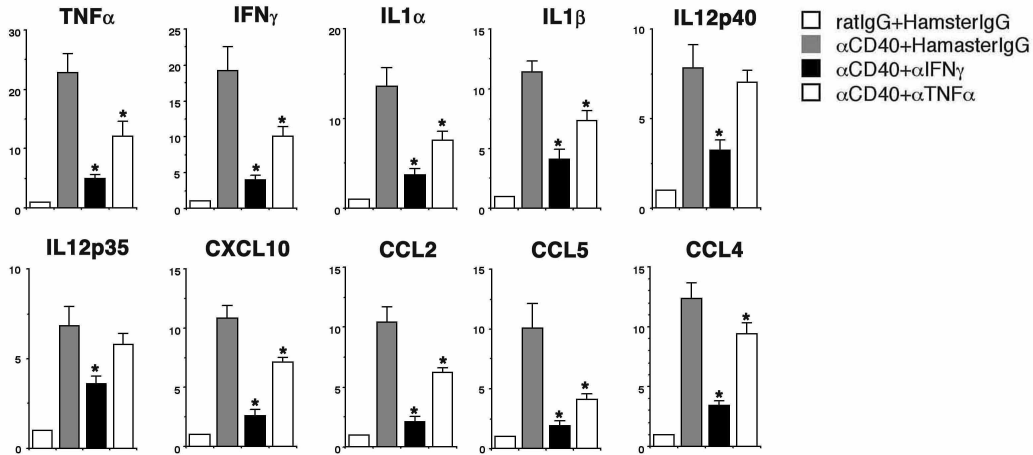

**A**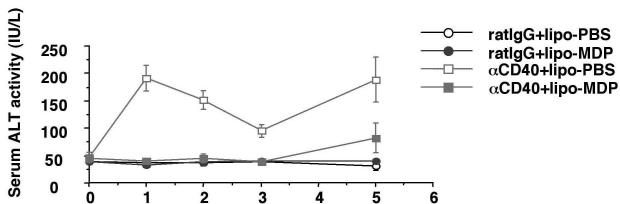**B**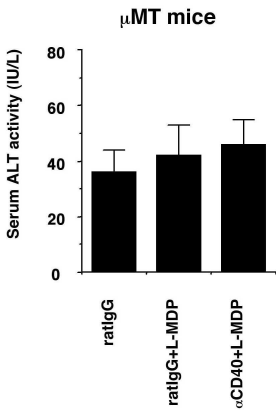

# sALT activity

## A

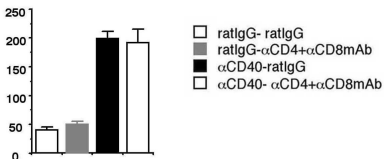

## B

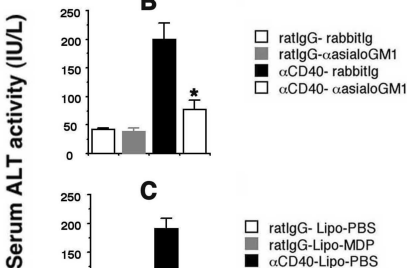

## C

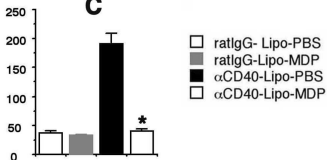

## D

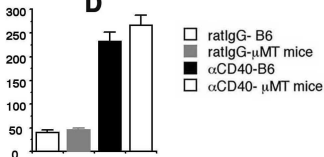

# IHLs

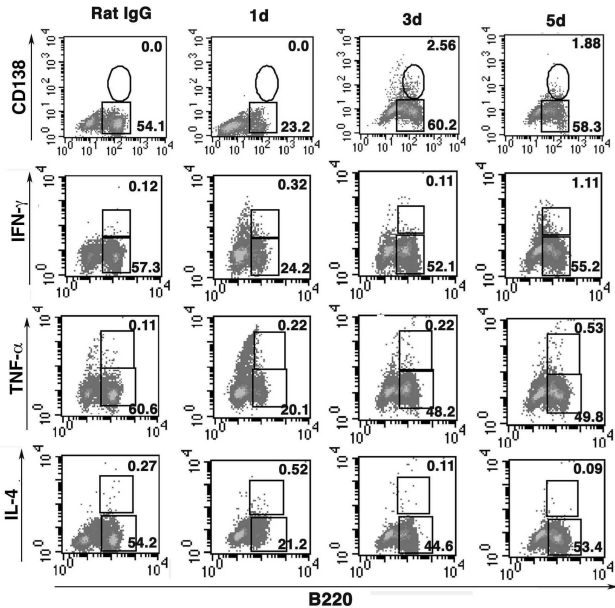

# Spleen

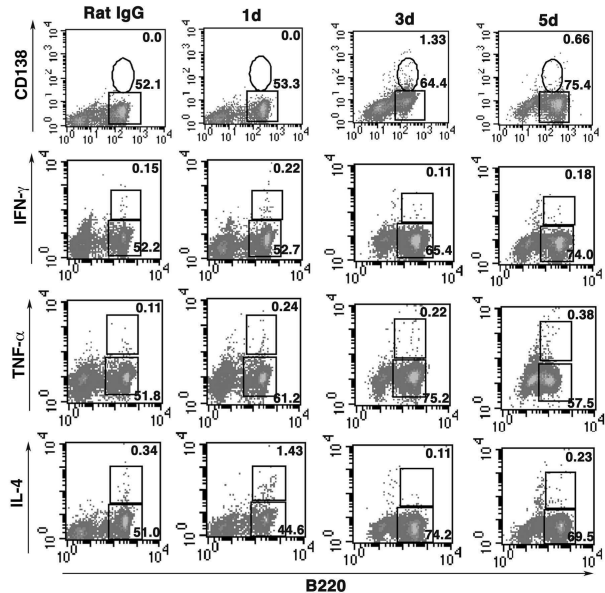

Supplement: amjpathol_168_3_786__1.pdf [file amjpathol_168_3_786__1.pdf]
